# Supplementary material
Source: Springer Nature journal article supplement (https://www.springermedizin.de/resource/supplementary/13023_2012_518_MOESM9_ESM.pdf/9642694)

**Percentage  
in age group**

**Year 2000 (41 individuals)**

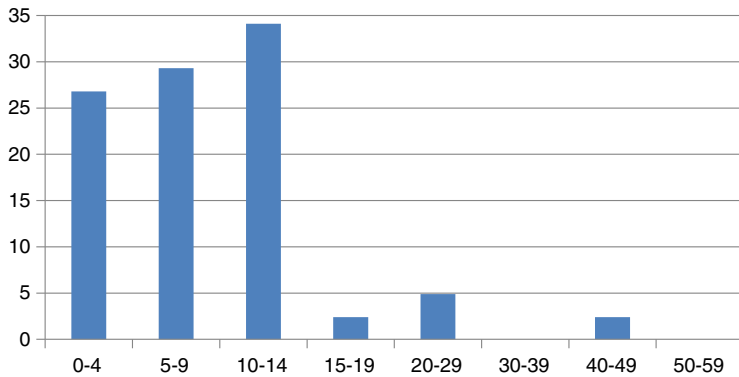

**Year 2011 (148 individuals)**

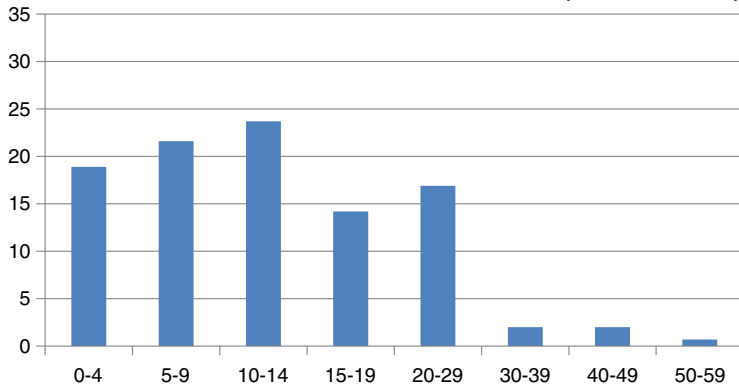

Supplement: MOESM9 [file 9642694]
